# Supplementary material
Source: ML conference proceedings conference paper supplement (https://proceedings.neurips.cc/paper_files/paper/2021/hash/d5c8e1ab6fc0bfeb5f29aafa999cdb29-Abstract.html)
Supplement: Supplementary file 1 [file d5c8e1ab6fc0bfeb5f29aafa999cdb29-Supplemental.zip]

Archive with 4 entries (3 files):
- Supplementary/
- Supplementary/main.pdf
- Supplementary/Offline_Constrained_Multi_Objective_Reinforcement_Learning_via_Pessimistic_Dual_Value_Iteration.pdf
- Supplementary/supplementary.pdf
